# Supplementary material
Source: PubMed Central journal article supplement (PMC2760923)
Supplement: NIHMS129022-supplement-01.pdf [file NIHMS129022-supplement-01.pdf]

## Defining Behavior

---

1 Should you choose to participate, please first indicate your level of knowledge of behavioral biology by clicking next to the statement that you feel most accurately describes you.

- I am a professional in behavioral biology.
  - I am knowledgeable about behavioral biology. (Have taken a course on behavioral biology, or gained equivalent knowledge)
  - I have little specialized knowledge regarding behavioral biology.
- 

Next, please indicate by clicking whether in your opinion each event described below qualifies as behavior, does not qualify as behavior, or if you don't know if it qualifies as behavior.

---

2 Ants that are physiologically capable of laying eggs do not do so because they are not queens.

- Behavior
  - Do Not Know
  - Not Behavior
- 

3 A sponge pumps water to gather food.

- Behavior
  - Do Not Know
  - Not Behavior
- 

4 A spider builds a web.

- Behavior
  - Do Not Know
  - Not Behavior
- 

5 A rabbit grows thicker fur in the winter.

- Behavior
  - Do Not Know
  - Not Behavior
- 

6 A plant's stomata (respiration pores), close to conserve water.

- Behavior
- Do Not Know
- Not Behavior

---

7 A plant bends its leaves toward a light source.

- Behavior
  - Do Not Know
  - Not Behavior
- 

8 A person's heart beats harder after a nightmare.

- Behavior
  - Do Not Know
  - Not Behavior
- 

9 A person sweats in response to hot air.

- Behavior
  - Do Not Know
  - Not Behavior
- 

10 A beetle is swept away by a strong current.

- Behavior
  - Do Not Know
  - Not Behavior
- 

11 A rat has a dislike for salty food.

- Behavior
  - Do Not Know
  - Not Behavior
- 

12 A person decides not to do anything tomorrow if it rains.

- Behavior
  - Do Not Know
  - Not Behavior
- 

13 A horse becomes arthritic with age.

- Behavior
- Do Not Know
- Not Behavior

---

21 A cat produces insulin because of excess sugar in her blood.

- Behavior
- Do Not Know
- Not Behavior

---

Next, please indicate whether you agree with, don't know if you agree with, or disagree with each statement about behavior.

---

22 A developmental change is usually not a behavior.

- Agree
- Do Not Know
- Disagree

23 Behavior is always in response to the external environment.

- Agree
- Do Not Know
- Disagree

24 A behavior is always an action, rather than a lack of action.

- Agree
- Do Not Know
- Disagree

25 All behaviors are directly observable, recordable and measurable.

- Agree
- Do Not Know
- Disagree

26 People can all tell what is and isn't behavior, just by looking at it.

- Agree
- Do Not Know
- Disagree

27 Behavior is always influenced by the internal processes of the individual.

- Agree
- Do Not Know
- Disagree

---

28 Behavior always involves movement.

- Agree
  - Do Not Know
  - Disagree
- 

29 Behaviors are always the actions of individuals, not groups.

- Agree
  - Do Not Know
  - Disagree
- 

30 Behavior is something whole individuals do, not organs or parts that make up individuals.

- Agree
  - Do Not Know
  - Disagree
- 

31 A behavior is always in response to a stimulus or set of stimuli, but the stimulus can be either internal or external.

- Agree
  - Do Not Know
  - Disagree
- 

32 Behavior is something only animals (including people) do, but not other organisms.

- Agree
  - Do Not Know
  - Disagree
- 

33 In humans, anything that is not under conscious control is not behavior.

- Agree
  - Do Not Know
  - Disagree
- 

34 Behavior is always executed through muscular activity.

- Agree
  - Do Not Know
  - Disagree
-
